# Supplementary material for: Effects of discontinuation of antihypertensive drugs on frailty syndrome in outpatients: a 1-year prospectively designed retrospective chart-review pilot study
Source: PubMed Central journal article supplement — J Int Med Res. 2022 Oct 31;50(10):03000605221130716. doi: 10.1177/03000605221130716 (PMC9629568; doi:10.1177/03000605221130716), 2022-10-31
Supplement: sj-pdf-1-imr-10.1177_03000605221130716.pdf [file sj-pdf-1-imr-10.1177_03000605221130716.pdf]

eTable 1. Conditions recorded and included in the total morbidity count except table 1 in discontinuing group

| <b>Condition</b>                            | <b>Number of subjects</b> |
|---------------------------------------------|---------------------------|
| Constipation                                | 2                         |
| Lung embolism                               | 1                         |
| Cataract                                    | 2                         |
| Chronic obstructive pulmonary disease       | 1                         |
| Colon polyp                                 | 1                         |
| Compression fracture                        | 1                         |
| Dry eye                                     | 1                         |
| Ear noise                                   | 1                         |
| Esophagocele                                | 1                         |
| Facial palsy                                | 1                         |
| Gallbladder polyp                           | 1                         |
| Glaucoma                                    | 3                         |
| Lumbar canal stenosis,                      | 1                         |
| Myodesopsia                                 | 1                         |
| Neurogenic bladder                          | 1                         |
| Reflux esophagitis                          | 1                         |
| Restless legs syndrome                      | 1                         |
| Sleep apnea Syndrome                        | 1                         |
| Depression                                  | 1                         |
| Epilepsy                                    | 1                         |
| Diffuse lung disease                        | 1                         |
| Osteonecrosis of the medial femoral condyle | 1                         |
| Hallux valgus                               | 1                         |
| Arthritis                                   | 1                         |
| Lower back pain                             | 1                         |
| Prostatic hypertrophy                       | 1                         |
| Insomnia                                    | 1                         |
| Bronchial Asthma                            | 1                         |

eTable 2. Conditions recorded and included in the total morbidity count except table 1 in continuing group

| <b>Condition</b>                      | <b>Number of subjects</b> |
|---------------------------------------|---------------------------|
| Constipation                          | 2                         |
| Hydrocephalus                         | 1                         |
| Allergic                              | 1                         |
| Atheroma                              | 1                         |
| Bronchial Asthma                      | 3                         |
| Cataract                              | 4                         |
| Cerebral aneurysm                     | 1                         |
| Cervical spondylosis                  | 2                         |
| Chronic prurigo                       | 1                         |
| Dizziness                             | 3                         |
| Dry eye                               | 2                         |
| Ear noise                             | 1                         |
| Eczema                                | 3                         |
| Empyema                               | 1                         |
| Glaucoma                              | 1                         |
| Hyperuricemia                         | 5                         |
| Hypoferric anemia                     | 1                         |
| Irritable bowel syndrome              | 1                         |
| Low back pain                         | 2                         |
| Lumbar canal stenosis,                | 6                         |
| Lumber vertebrae herniated disk       | 1                         |
| Mild cognitive impairment             | 1                         |
| Reflux esophagitis                    | 4                         |
| Ureteral stone                        | 1                         |
| Uterine myoma                         | 1                         |
| Chronic kidney disease                | 4                         |
| Chronic obstructive pulmonary disease | 3                         |
| Hepatitis C virus carrier             | 1                         |
| Myelodysplastic syndromes             | 1                         |
| Aspirin asthma                        | 1                         |
| Depression                            | 1                         |
| Liver failure                         | 1                         |

|                                        |   |
|----------------------------------------|---|
| Ptosis                                 | 2 |
| Lumbar kyphosis deformity              | 1 |
| Urinary                                | 1 |
| De Quervain's tenosynovitis            | 1 |
| Shoulder pain                          | 1 |
| Uterine prolapse                       | 1 |
| Carpal tunnel syndrome                 | 1 |
| Sleep Apnea Syndrome                   | 2 |
| Sacroiliac joint dysfunction           | 1 |
| Prostatic hypertrophy                  | 1 |
| Leg pain                               | 1 |
| Cholecystolithiasis                    | 1 |
| Gout                                   | 1 |
| Sudden deafness                        | 1 |
| Nontuberculous mycobacterial infection | 1 |
| Knee pain                              | 1 |
| Insomnia                               | 4 |
| Peripheral neuropathy                  | 1 |
| Drug-induced parkinsonism              | 1 |

Conditions recorded and included in the total morbidity count except table 1 in continuing group  
(continued)
